# Supplementary material for: The Splicing Variant TFIIIA-7ZF of Viroid-Modulated Transcription Factor IIIA Causes Physiological Irregularities in Transgenic Tobacco and Transient Somatic Depression of “Degradome” Characteristic for Developing Pollen
Source: MDPI journal article supplement (doi:10.3390/cells11050784), 2022-02-23
Supplement: s1 [file s1]

# Supplementary Materials: The splicing variant TFIIIA-7ZF of viroid-modulated transcription factor IIIA causes physiological irregularities in transgenic tobacco and transient somatic depression of “degradome” characteristic for developing pollen

Jaroslav Matoušek <sup>1</sup> and Gerhard Steger <sup>2,\*</sup> 

## List of Figures

- |                                                                                                                                                                                                           |   |
|-----------------------------------------------------------------------------------------------------------------------------------------------------------------------------------------------------------|---|
| S1. Protein domains of <i>NtPNI</i> , <i>NbTFIIIA-7ZF</i> , and <i>NtTFIIIA</i>                                                                                                                           | 2 |
| S2. Schematic representation of the plant vector pJM14 with integrated <i>NbTFIIIA-7Z</i>                                                                                                                 | 3 |
| S3. Relative levels of TFIIIA and NPTII mRNAs in tobacco plants transformed either with vector pJM14 containing <i>NbTFIIIA-7ZF</i> or with infectious pFAST vectors bearing dimeric AFCVd or CBCVd cDNAs | 4 |
| S4. Relative mRNA levels of pollen extracellular nuclease (PNI) mRNA in various stages of tobacco anthers and pollen development                                                                          | 5 |
| S5. Plant vector cassettes used for transformation of <i>N. tabacum</i> with AFCVd and CBCVd infectious dimeric (++) cDNAs                                                                                | 6 |

## List of Tables

- |                                                                                           |   |
|-------------------------------------------------------------------------------------------|---|
| S1. Primers used for strand-specific RT-qPCR and quantification of mRNA levels by RT-qPCR | 7 |
|-------------------------------------------------------------------------------------------|---|

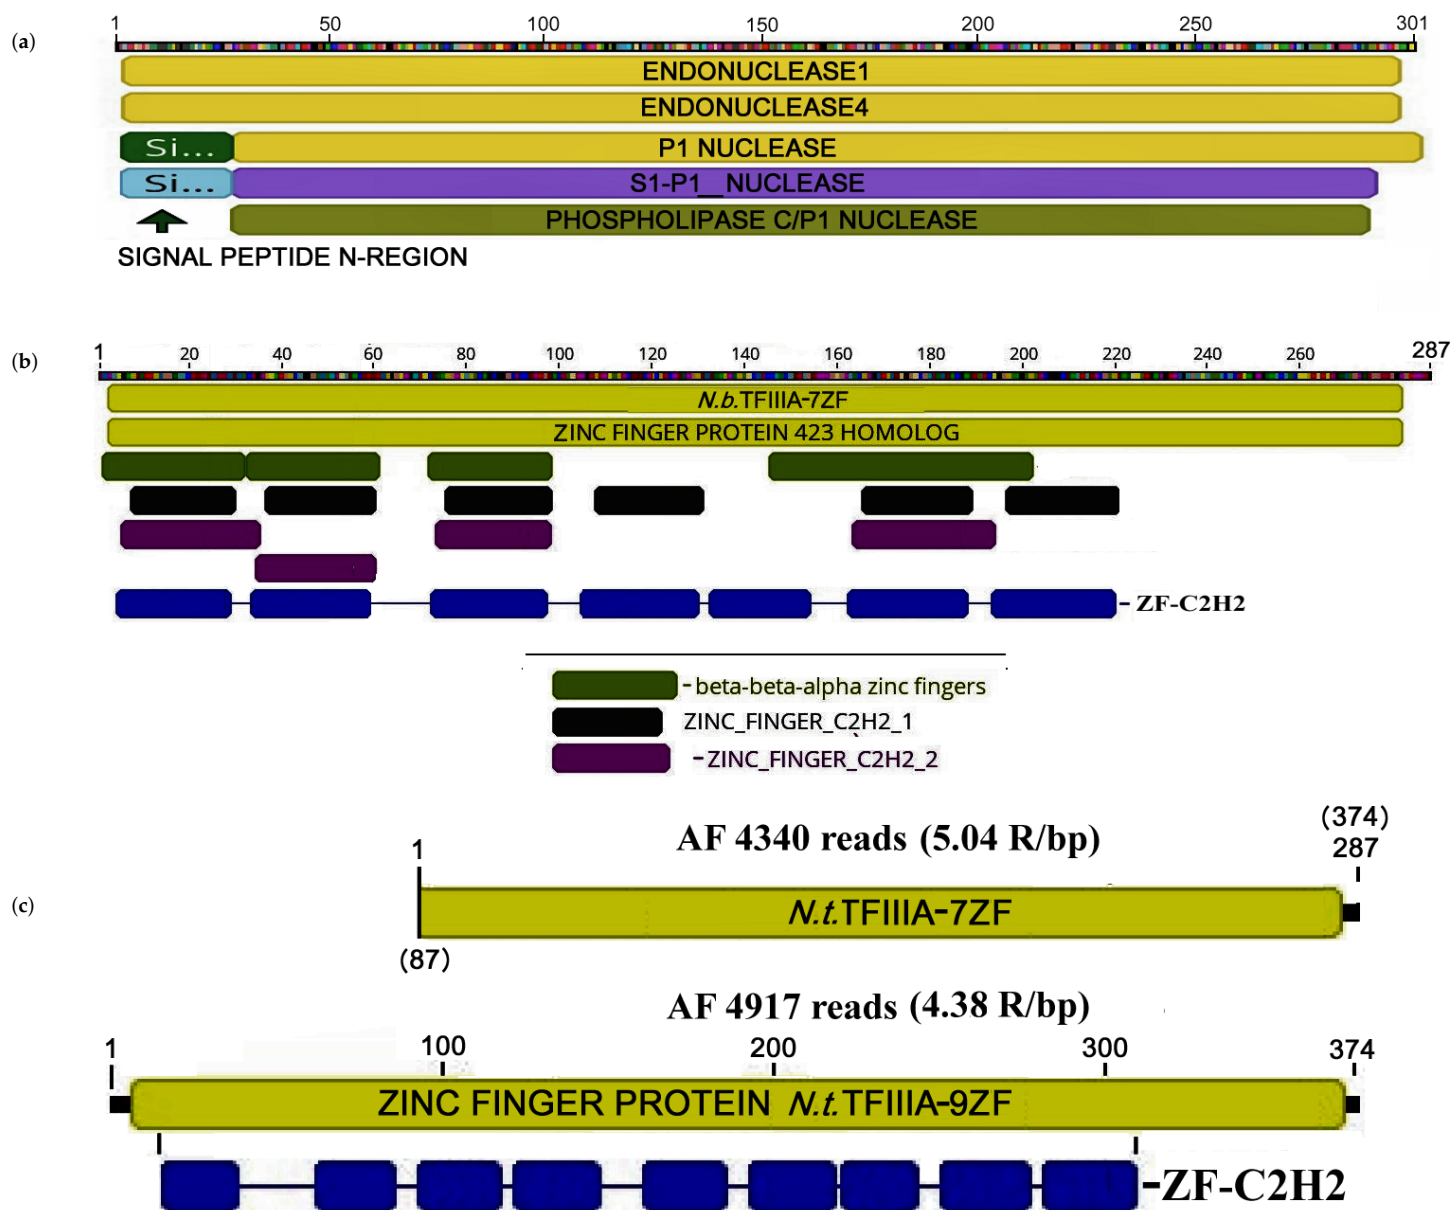

**Figure S1.** Protein domains of (a) *NtPNI* (pollen extracellular nuclease I, plant nuclease I, GenBank AC XP\_016459651.1), (b) *NbTFIIIA-7ZF* [1], and (c) *NtTFIIIA*. Domains were predicted and visualized using InterProScan [2] and Geneious Prime 2020.04 software, respectively.

(a) PNI is a potential member of pollen “degradation complex” supplementing our analyzes performed previously [1].

(b) *NbTFIIIA* was amplified from *N. benthamiana* plants infected with lethal PSTVd strain AS1 [3]. This authentic sequence was cloned into vector pJM14 [1] and transformed in this study to *N. tabacum*. *NtTFIIIA-9ZF* homologue was derived from *N. tabacum* genomic sequences using BLAST [4].

(c) *NtTFIIIA-9ZF* cDNA (top) and the corresponding nucleotide fragment covering *NtTFIIIA-7ZF* (bottom) cDNAs were used as targets for mapping of high identity NGS reads from AFCVd transformed/infected tobacco using Geneious Prime® 2022.0.1 (see Material and Methods). The total number of reads per sequenced transcriptome and the density of corresponding reads per bp of cDNA fragment (R/bp) are indicated above the aa sequence schemes.

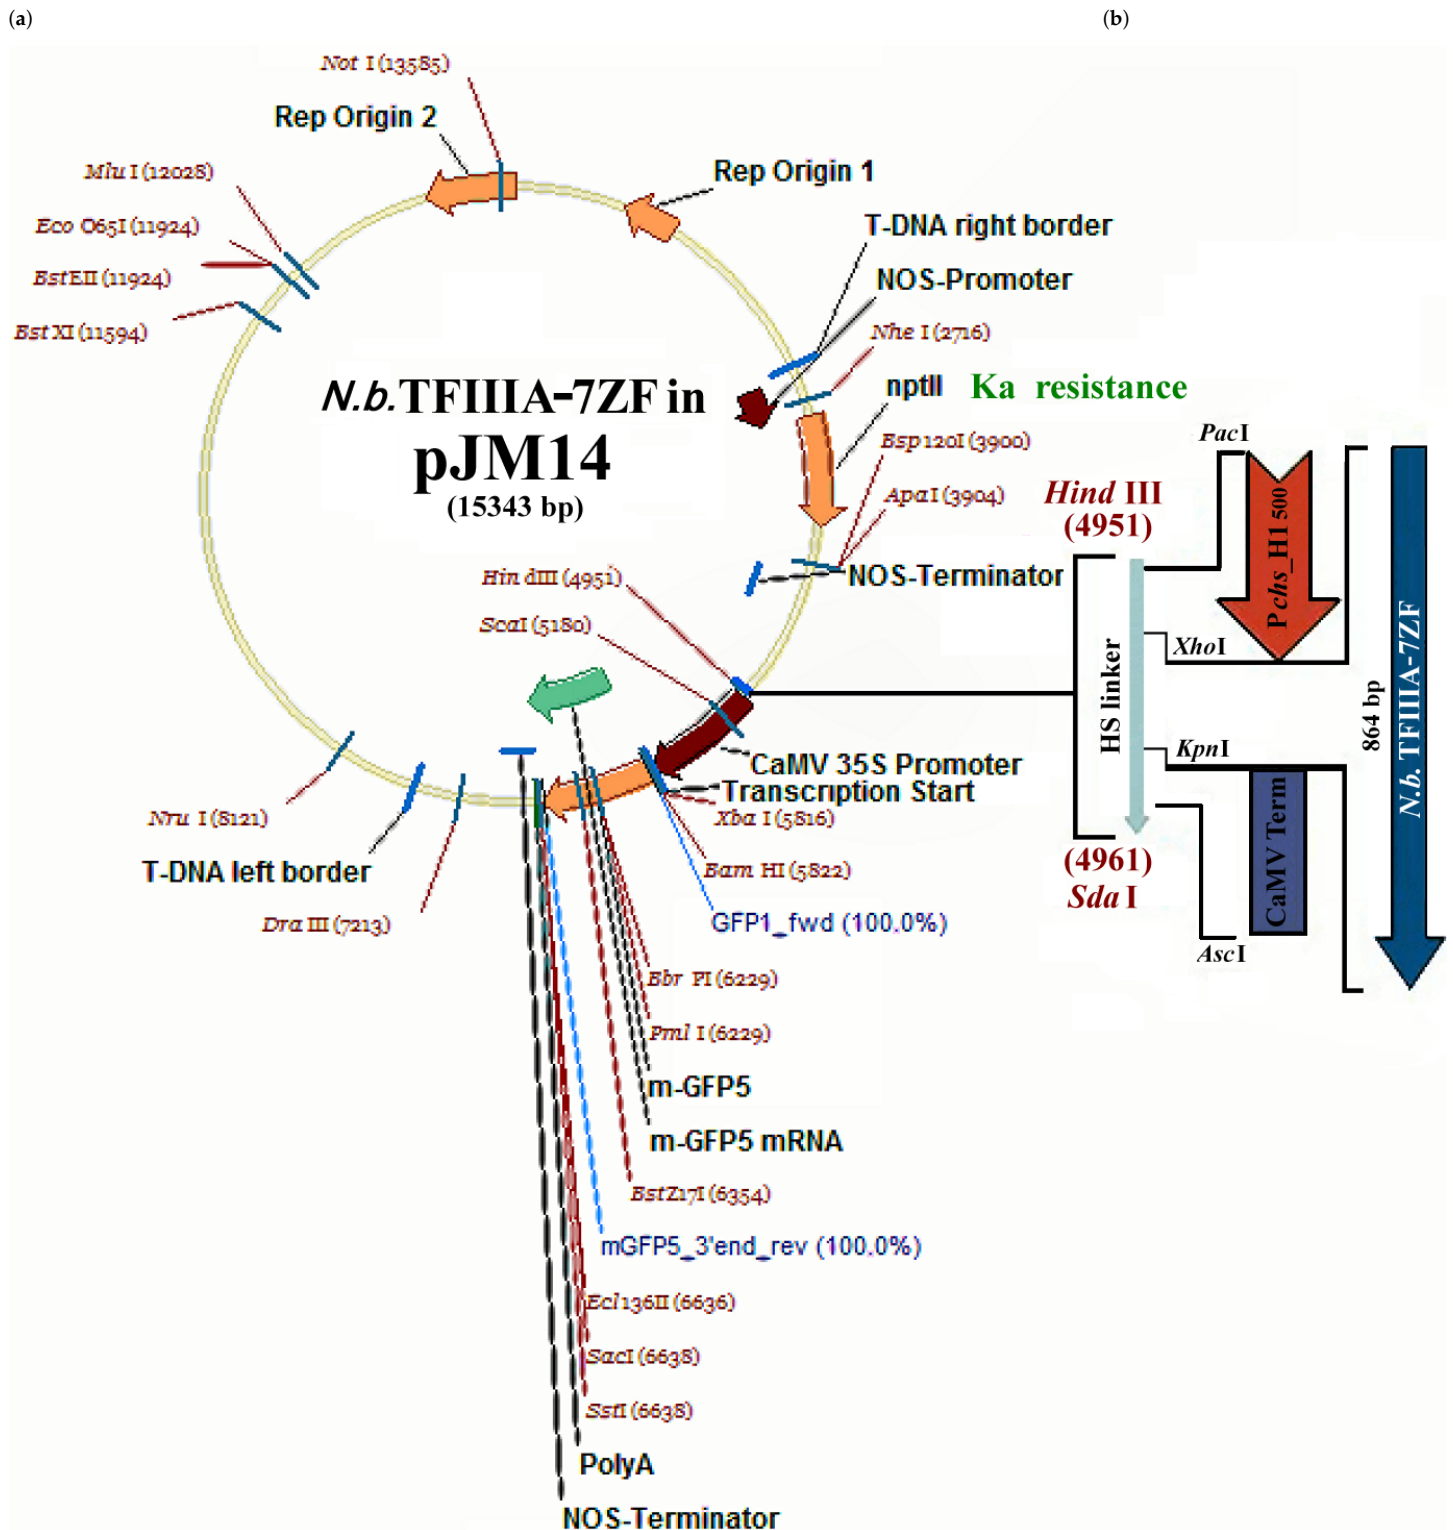

**Figure S2.** Schematic representation of the plant vector pJM14 with integrated *NbTFIIIA-7Z*. (a) The *NbTFIIIA-7Z* cDNA (864 bp) was integrated into pJM14 [1] using the unique restriction sites *XhoI* and *KpnI* within the sequence of the expression cassette (b). The scheme in (b) is not to scale. The vector provides plant resistance to kanamycin.

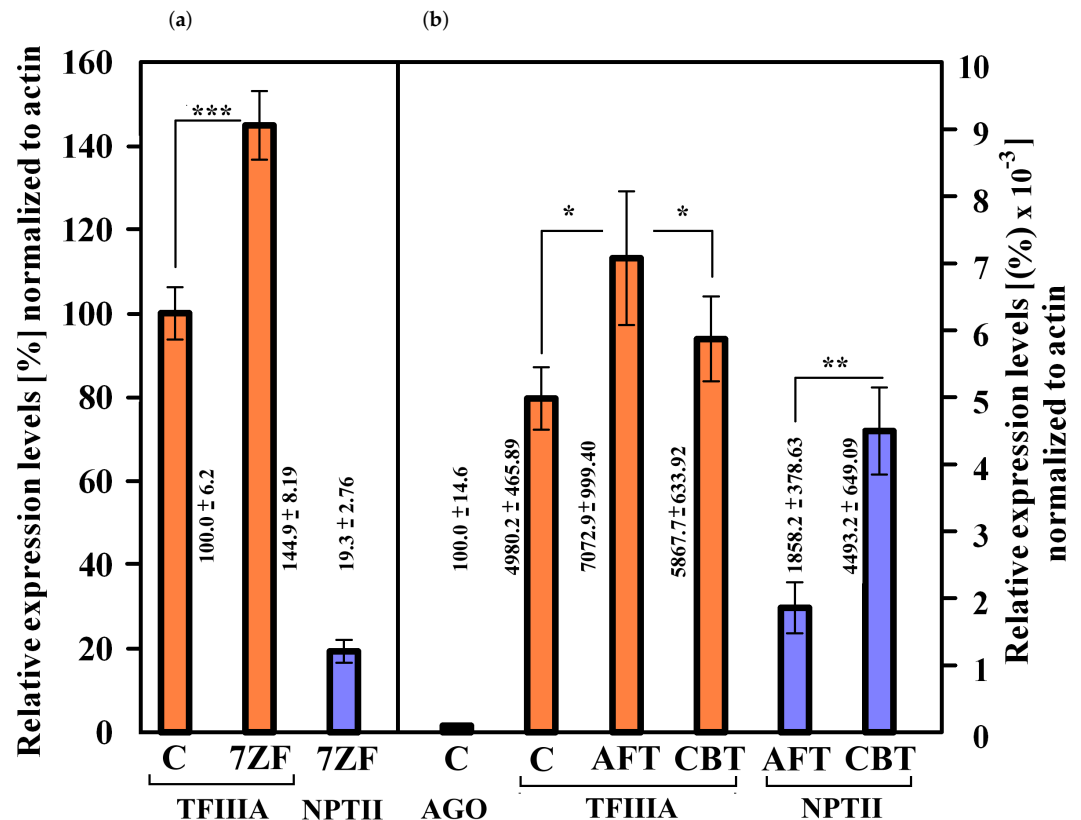

**Figure S3.** Relative levels of TFIIIA and NPTII mRNAs in tobacco plants transformed either with vector pJM14 containing *NbTFIIIA*-7ZF (a) or with infectious pFAST vectors (see Figure S5) bearing dimeric AFCVd (AFT) or CBCVd (CBT) cDNAs (b).

(a) Level of endogenous TFIIIA in untransformed control (C) is shown, while the level in transformants (7ZF) includes endogenous TFIIIA together with transgene-expressed *NbTFIIIA*-7ZF (orange columns). For transgenic plants 7ZF also level of mRNA for kanamycin resistance gene (NPTII) is shown (blue column). No specific NPTII signals were observed for control tobacco plants.

(b) Levels of endogenous TFIIIA are shown for control (C) and transgenic AFT and CBT variants (orange columns). Levels of NPTII mRNA in transgenotes are shown by the blue columns. No specific NPTII signal was detectable in controls. Each column represents the mean ± SD of two replicates of each PCR reaction. The level of AGO in controls was set to 100%.

Lines with asterisks indicate statistical differences between connected values (\*, statistically non-significant differences at  $p > 0.05$ ; \*\*, statistically significant differences at  $p < 0.05$ ; \*\*\*, statistically significant differences at  $p < 0.01$ ).

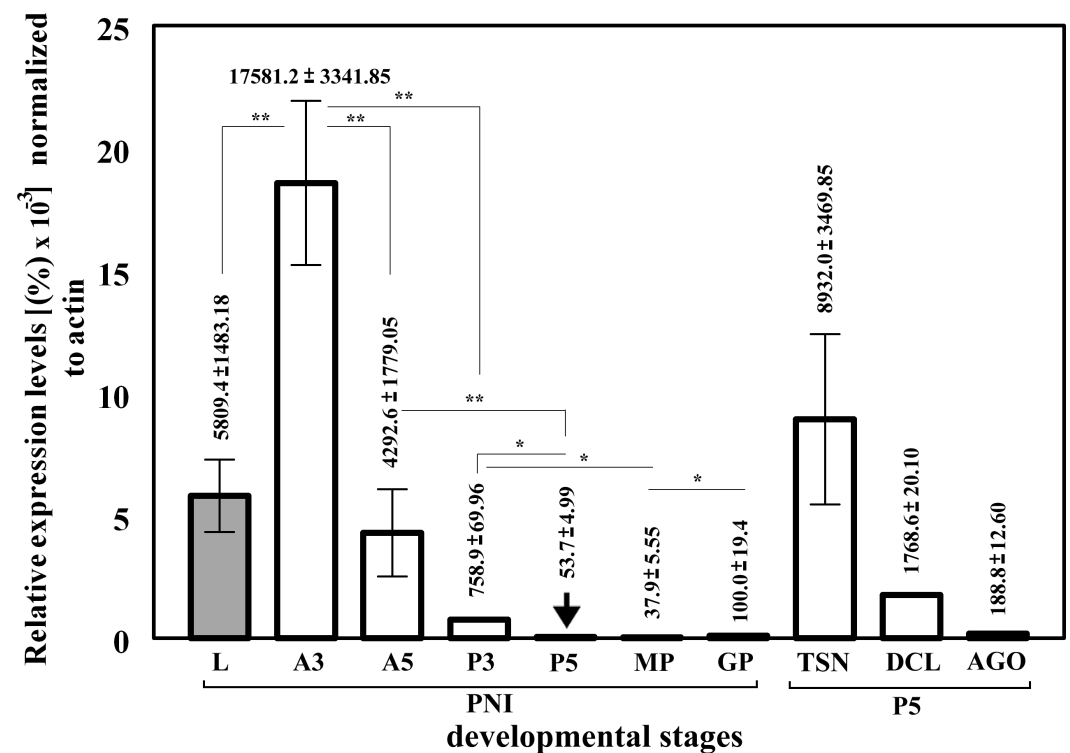

**Figure S4.** Relative mRNA levels of pollen extracellular nuclease (PNI) mRNA in various stages of tobacco anthers and pollen development. For comparison, PNI levels are shown in young leaves (L), in whole anthers of developmental stages 3 (A3) and 5 (A5), respectively, in isolated immature pollen of stages 3 (P3) and 5 (P5), respectively, in mature pollen (MP), and in 6 hours germinating tobacco pollen (pollen tubes, GP). The levels of PNI in GP was taken as 100%. The asterisk indicates very low level of PNI already in stage P5. In the right part of the graph, comparative analysis of the levels of other factors that could participate in viroid degradation in pollen [1] are shown at critical stage P5 of pollen development: *Nt*Tudor S-like nuclease (TSN), *Nt*DCL (DCL), and *Nt*AGO5 (AGO). Results of qPCR, performed as described in Materials and Methods, were normalized to actin. The mean value ± SD of two replicates of each PCR reaction is shown. Lines with asterisks indicate statistically evaluated differences between connected PNI values (\*, statistically non-significant differences at  $p > 0.05$ ; \*\*, statistically significant differences at  $p < 0.05$ ; \*\*\*, statistically significant differences at  $p < 0.01$ ).

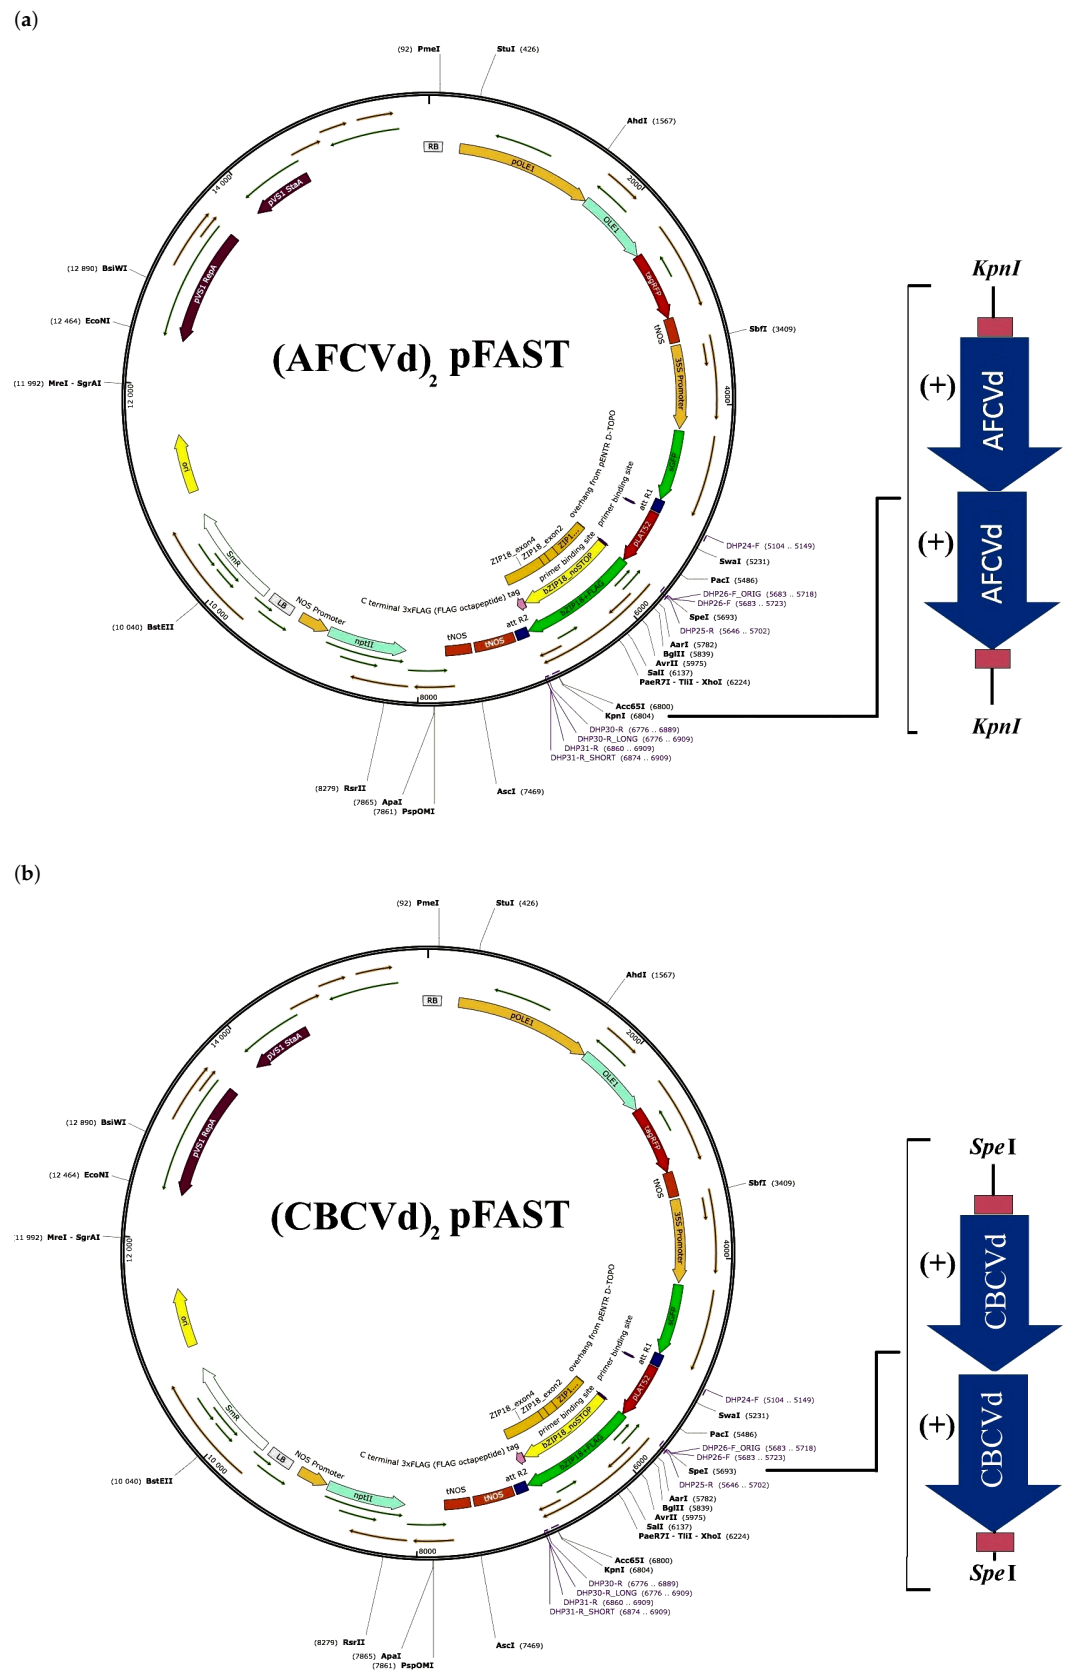

**Table S1.** Primers used for strand-specific RT-qPCR and quantification of mRNA levels by RT-qPCR.

| No                                      | Designation      | Sequence 5'→3'              | Purpose                                | Ref. |
|-----------------------------------------|------------------|-----------------------------|----------------------------------------|------|
| NtTFIIIA-9ZF, NtTFIIIA-7ZF, NbTFIIIA-7Z |                  |                             |                                        |      |
| 1                                       | NtTFIIIA_F2      | GACATCTCTTGCAGCACCAAG       | RT-qPCR                                |      |
| 2                                       | NtTFIIIA_R2      | AACAAAGTGCCTCCATCGTC        |                                        |      |
| AFCVd                                   |                  |                             |                                        |      |
| 3                                       | AFCVdRTPL        | TCGTGACGACGAGTCACCAGGTG     | cDNA synthesis – reverse transcription | [5]  |
| 4                                       | AFCVdRTMI        | GTGACTCGTTCGTCGACGAAGGGTC   |                                        | [5]  |
| 5                                       | AFCVd PCR_FOR    | CCGGTCGTGGATACCTAGGA        | RT-qPCR                                | [5]  |
| 6                                       | AFCVd PCR_REV    | ACGCGGCCTTCGGTGTG           |                                        | [5]  |
| CBCVd                                   |                  |                             |                                        |      |
| 7                                       | CVdRTPL          | AAGCCTGGGAGGAACAACCCAAGAG   | cDNA synthesis – reverse transcription | [5]  |
| 8                                       | CVdRTMI          | GGATCCCCGGGGAAATCTCTTCAG    |                                        | [5]  |
| 9                                       | CVd PCR_FOR      | TCACTGGCGTCCAGCACC          | RT-qPCR                                | [5]  |
| 10                                      | CVd PCR_REV      | AGGAAGAAGCGACGATCGG         |                                        | [5]  |
| NtPNI                                   |                  |                             |                                        |      |
| 11                                      | NtPNI-F          | AACGGCGACTTATCGGCACTC       | RT-qPCR                                |      |
| 12                                      | NtPNI-R          | TGGATTGCACCAGCCACACAC       |                                        |      |
| NtDICER-like homologues                 |                  |                             |                                        |      |
| 13                                      | pollenDcl-F      | GAGTGCATGAAACATATGATACAG    | RT-qPCR                                | [1]  |
| 14                                      | pollenDcl-R      | GAGAACTCTCAAGAAGCMTTGA      |                                        | [1]  |
| NtAGO5                                  |                  |                             |                                        |      |
| 15                                      | 1AGO5F           | CAGCCTTCATCATCACAACG        | RT-qPCR                                | [1]  |
| 16                                      | 1AGO5R           | CGTCCAACAGTTCGGTATCC        |                                        | [1]  |
| NtTUDOR S1-like nuclease (NtTSN)        |                  |                             |                                        |      |
| 17                                      | TunucF           | GTGGATGAGCCATTTGCATG        | RT-qPCR                                | [1]  |
| 18                                      | TunucR           | GATGCCTCAGAAGCACCAGG        |                                        | [1]  |
| Senescence regulating factor NtNAC080   |                  |                             |                                        |      |
| 19                                      | NtNAC_for        | TAACCAAATAGTCCCAGTTCAGAGC   | RT-qPCR                                | [6]  |
| 20                                      | NtNAC_rev        | GTAACCTCAAAGGCAATCAAGACTC   |                                        | [6]  |
| Senescence marker NtCP1                 |                  |                             |                                        |      |
| 21                                      | NtCP1_for        | CAGTGGCTAATCAACCTGTTTCGG    | RT-qPCR                                | [6]  |
| 22                                      | NtCP1_rev        | ACACCACTTGAATAGAACTGGAAATCG |                                        | [6]  |
| NtACTIN2                                |                  |                             |                                        |      |
| 23                                      | NtActin_For      | ACCTCTATGGCAACATTGTGCTCAG   | RT-qPCR                                | [6]  |
| 24                                      | NtActin_Rev      | CTGGGAGCCAAAGCGGTGATT       |                                        | [6]  |
| NtACTIN                                 |                  |                             |                                        |      |
| 25                                      | ACT-F1           | TTCTGTTCCAACCATCAATGA       | RT-qPCR                                | [1]  |
| 26                                      | ACT-R1           | GTACCACCACTGAGGACAATGT      |                                        | [1]  |
| 7SL RNA                                 |                  |                             |                                        |      |
| 27                                      | primer- $\alpha$ | TGTAACCCAAGTGGGGG           | Reverse transcription and RT-qPCR      | [7]  |
| 28                                      | anti- $\beta$    | GCACCGGCCCGTTATCC           |                                        | [7]  |

## References

1. Matoušek, J.; Steinbachová, L.; Drábková, L.; Kocábek, T.; Potěšil, D.; Mishra, A.; Honys, D.; Steger, G. Elimination of viroids from tobacco pollen involves a decrease in propagation rate and an increase of the degradation processes. *Int. J. Mol. Sci.* **2020**, *21*, 3029, [<http://dx.doi.org/10.3390/ijms21083029>].
2. Jones, P.; Binns, D.; Chang, H.Y.; Fraser, M.; Li, W.; McAnulla, C.; McWilliam, H.; Maslen, J.; Mitchell, A.; Nuka, G.; et al. InterProScan 5: genome-scale protein function classification. *Bioinformatics* **2014**, *30*, 1236–1240, [<https://doi.org/10.1093/bioinformatics/btu031>].
3. Matoušek, J.; Kozlová, P.; Orctová, L.; Schmitz, A.; Pešina, K.; Bannach, O.; Diermann, D.; Steger, G.; Riesner, D. Accumulation of viroid-specific small RNAs and increase of nucleolytic activities linked to viroid-caused pathogenesis. *Biol. Chem.* **2007**, *388*, 1–13, [<https://doi.org/10.1515/BC.2007.001>].
4. Boratyn, G.; Camacho, C.; Cooper, P.; Coulouris, G.; Fong, A.; Ma, N.; Madden, T.; Matten, W.; McGinnis, S.; Merezhuk, Y.; et al. BLAST: a more efficient report with usability improvements. *Nucleic Acids Res.* **2013**, *41*, W29–33, [<https://doi.org/10.1093/nar/gkt282>].
5. Matoušek, J.; Siglová, K.; Jakše, J.; Radišek, S.; Brass, J.; Tsushima, T.; Guček, T.; Duraisamy, G.; Sano, T.; Steger, G. Propagation and some physiological effects of *Citrus bark cracking viroid* and *Apple fruit crinkle viroid* in multiple infected hop (*Humulus lupulus* L.). *J. Plant Physiol.* **2017**, *213*, [<https://doi.org/10.1016/j.jplph.2017.02.014>].
6. Li, W.; Li, X.; Chao, J.; Zhang, Z.; Wang, W.; Guo, Y. NAC family transcription factors in tobacco and their potential role in regulating leaf senescence. *Front. Plant. Sci.* **2018**, *9*, 1900, [<https://doi.org/10.3389/fpls.2018.01900>].
7. Matoušek, J.; Junker, V.; Vrba, L.; Schubert, J.; Patzak, J.; Steger, G. Molecular characterization and genome organization of 7 SL RNA genes from hop (*Humulus lupulus* L.). *Gene* **1999**, *239*, 173–183, [[https://doi.org/10.1016/S0378-1119\(99\)00352-2](https://doi.org/10.1016/S0378-1119(99)00352-2)].
